# Supplementary material for: Simplifying the synthesis of carbon inverse opals
Source: Royal Society of Chemistry journal article supplement (doi:10.1039/d0ra03693e), 2020-01-01
Supplement: d0ra03693e1.pdf [file d0ra03693e1.pdf]

**Electronic Supplementary Information for:**  
**Simplifying the Synthesis of Carbon Inverse Opals**

David McNulty, Victor Landgraf and Sigita Trabesinger\*

Battery Electrodes and Cells, Electrochemistry Laboratory, Paul Scherrer Institute,  
Forschungsstrasse 111, 5232 Villigen PSI, Switzerland

\*Email: [sigita.trabesinger@psi.ch](mailto:sigita.trabesinger@psi.ch); Phone: +41 56 310 57 75

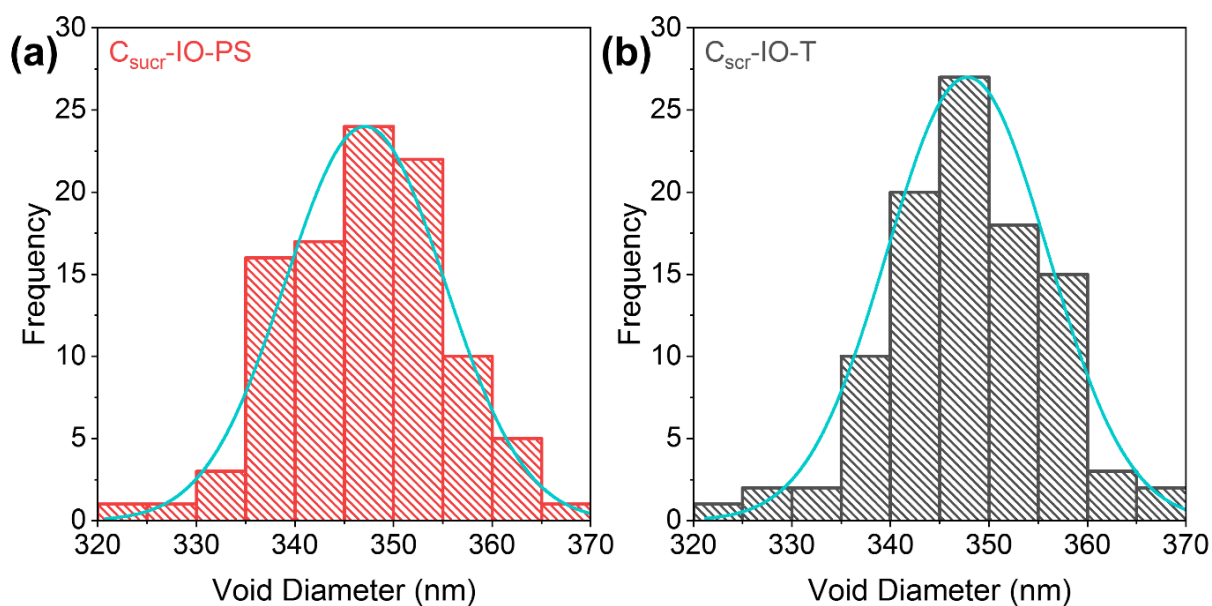

**Fig. S1.** Histograms showing the distribution of void diameters over 100 measurements for (a)  $C_{\text{sucr}}\text{-IO-PS}$  and (b)  $C_{\text{scr}}\text{-IO-T}$  samples.

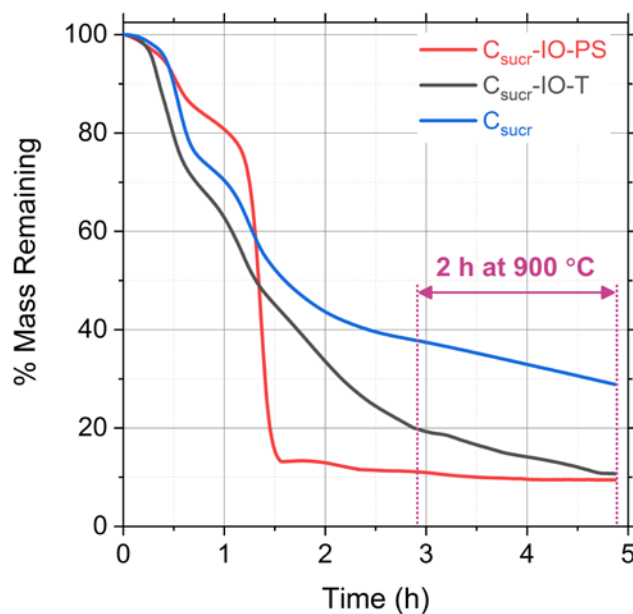

**Fig. S2.** Thermogravimetric analysis mass loss curves for carbon IOs prepared with ( $C_{sucr}$ -IO-PS) and without ( $C_{sucr}$ -IO-T) a template removal step and for a carbon sample prepared without a polystyrene sphere template ( $C_{sucr}$ ). Samples were heated from 40 °C to 900 °C at a heating rate of 5 °C/min and then held at 900 °C for 2 h.
